# Supplementary material
Source: PubMed Central journal article supplement (PMC8254975)
Supplement: 13054_2021_3661_MOESM2_ESM.pdf [file 13054_2021_3661_MOESM2_ESM.pdf]

# Hazard ratio

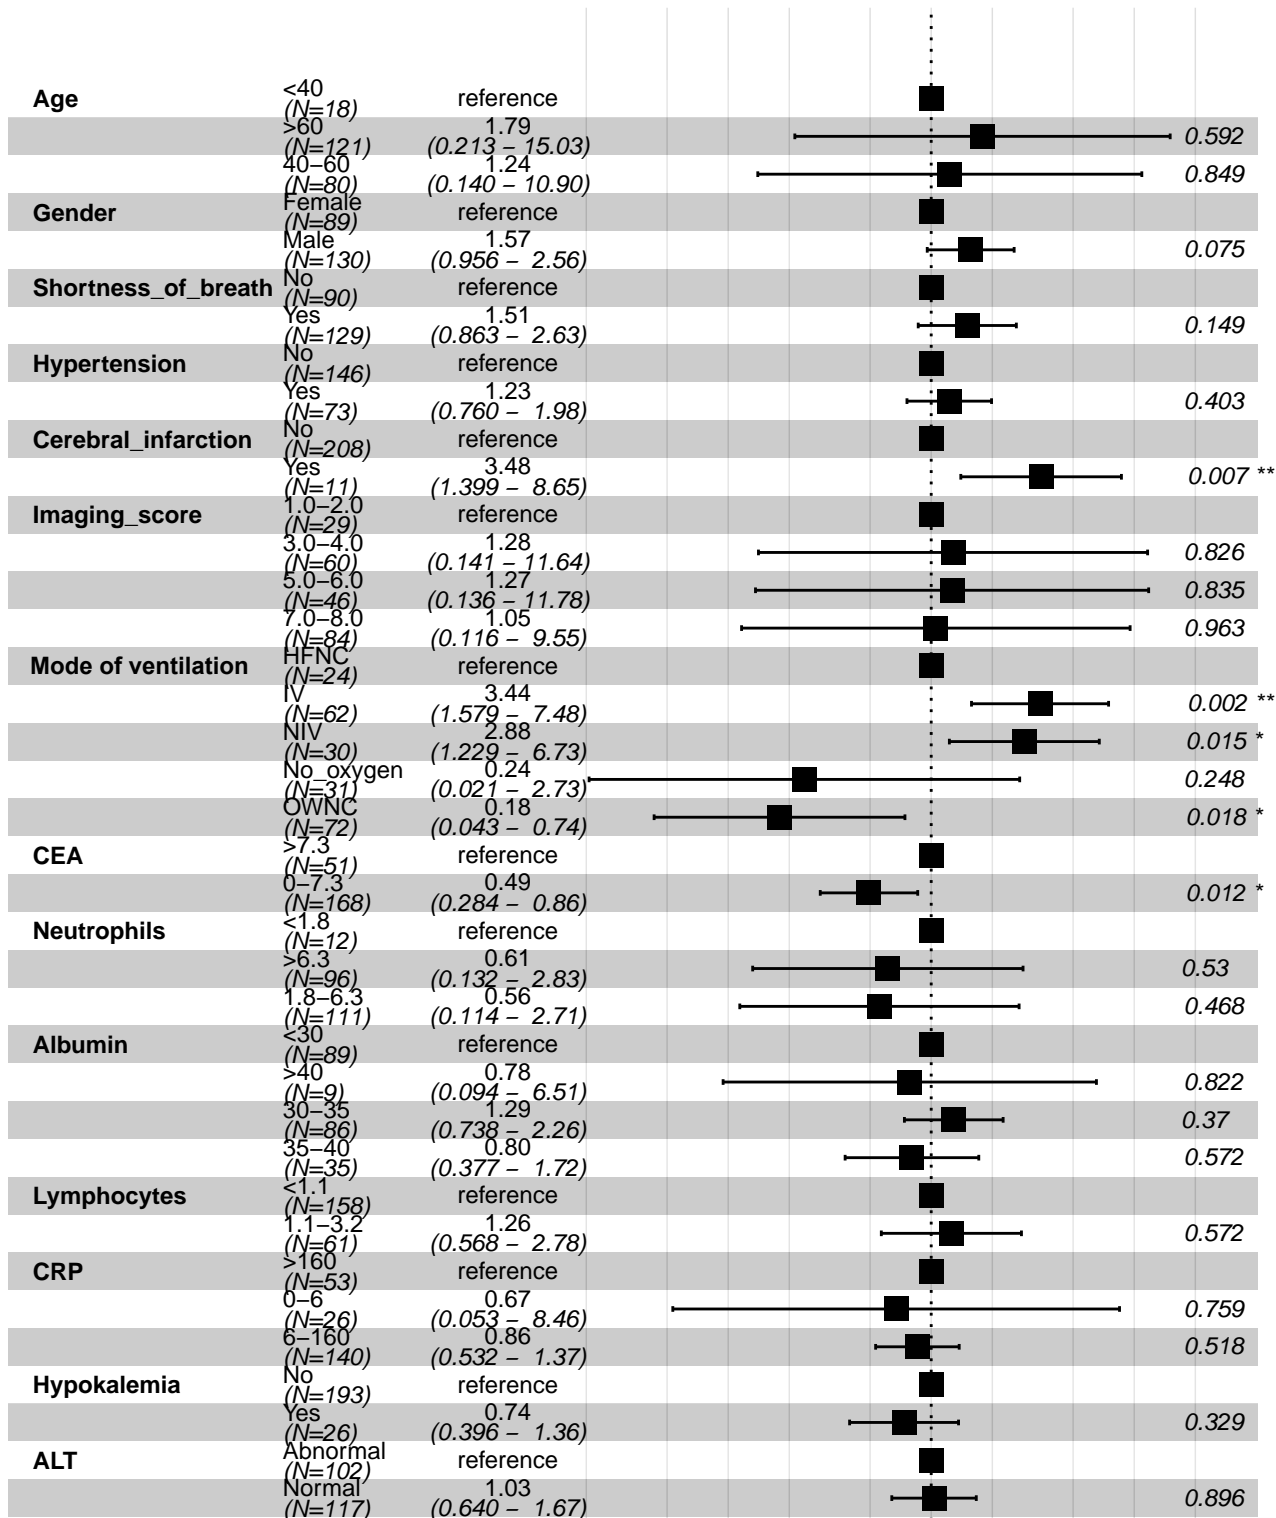

# Events: 96; Global p-value (Log-Rank): 5.066e-15

AIC: 801.4; Concordance Index: 0.8

0.02    0.05    0.1    0.2    0.5    1    2    5    10    20

# Hazard ratio

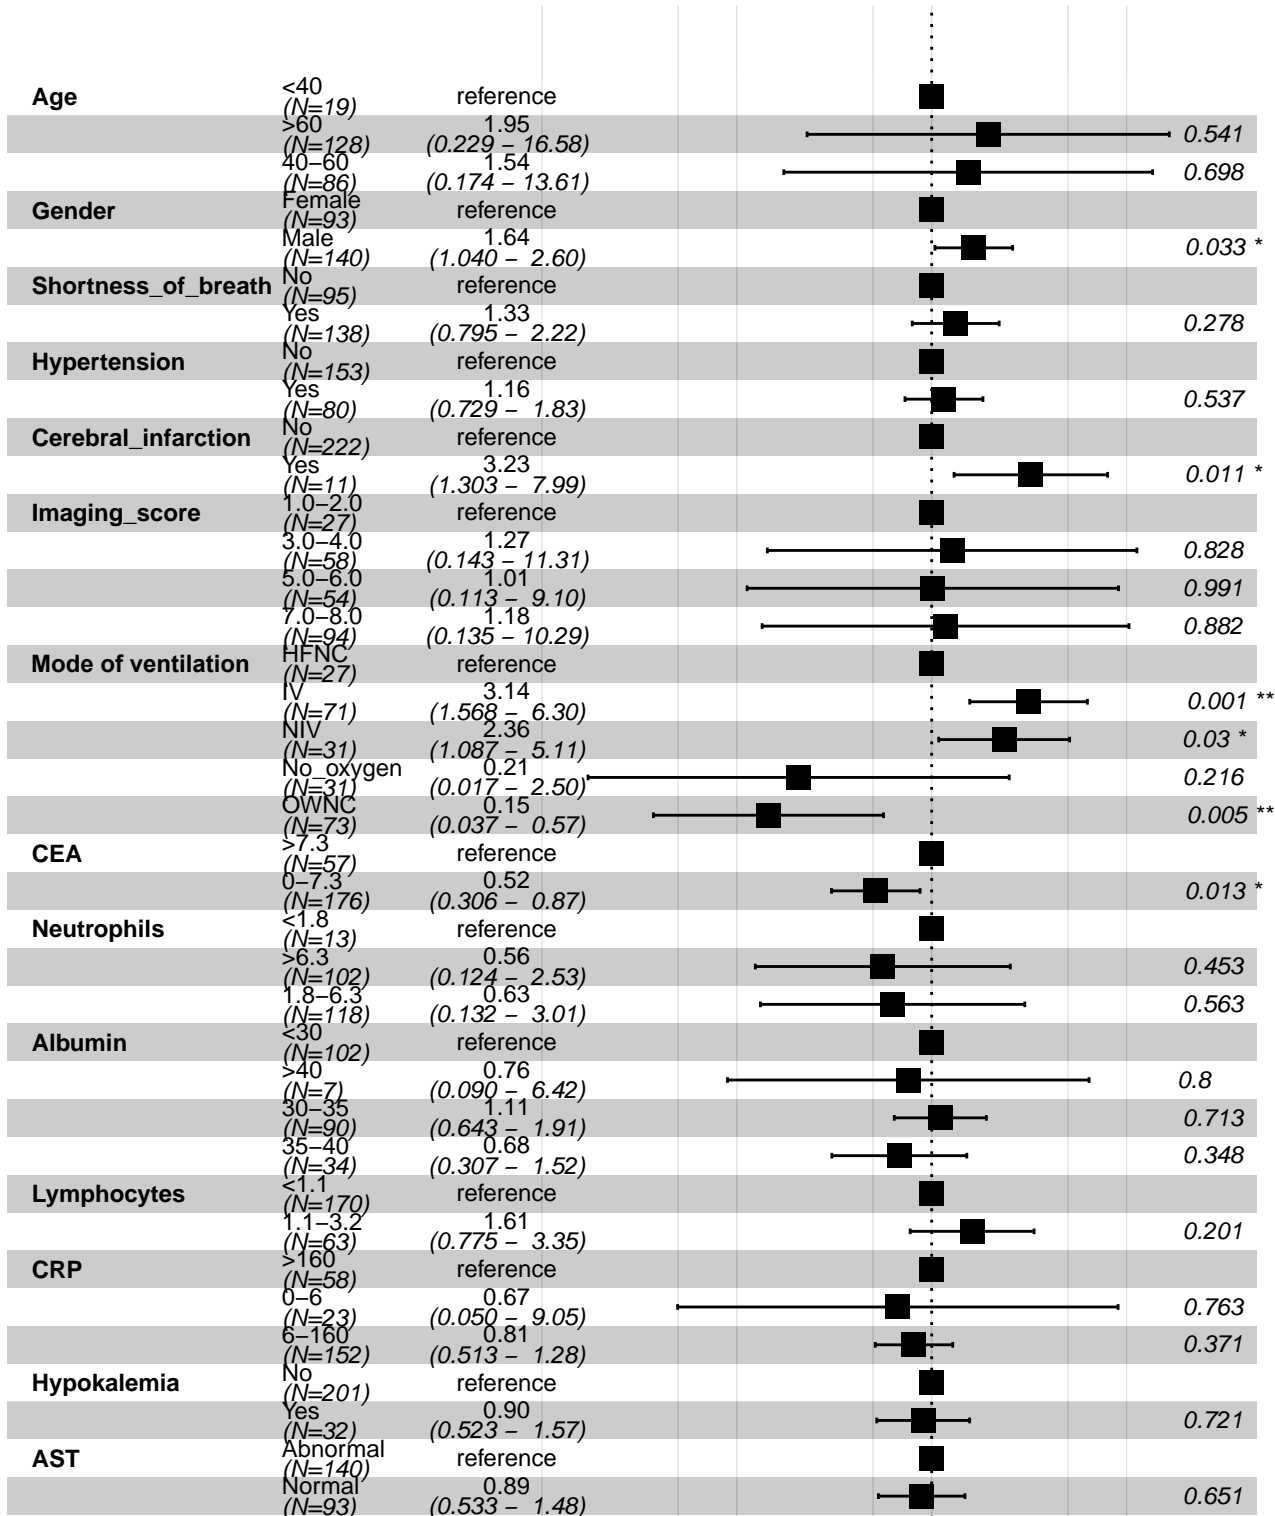

# Events: 107; Global p-value (Log-Rank): 8.1088e-16

AIC: 907.37; Concordance Index: 0.79

0.01      0.05      0.1      0.5      1      5      10

# Hazard ratio

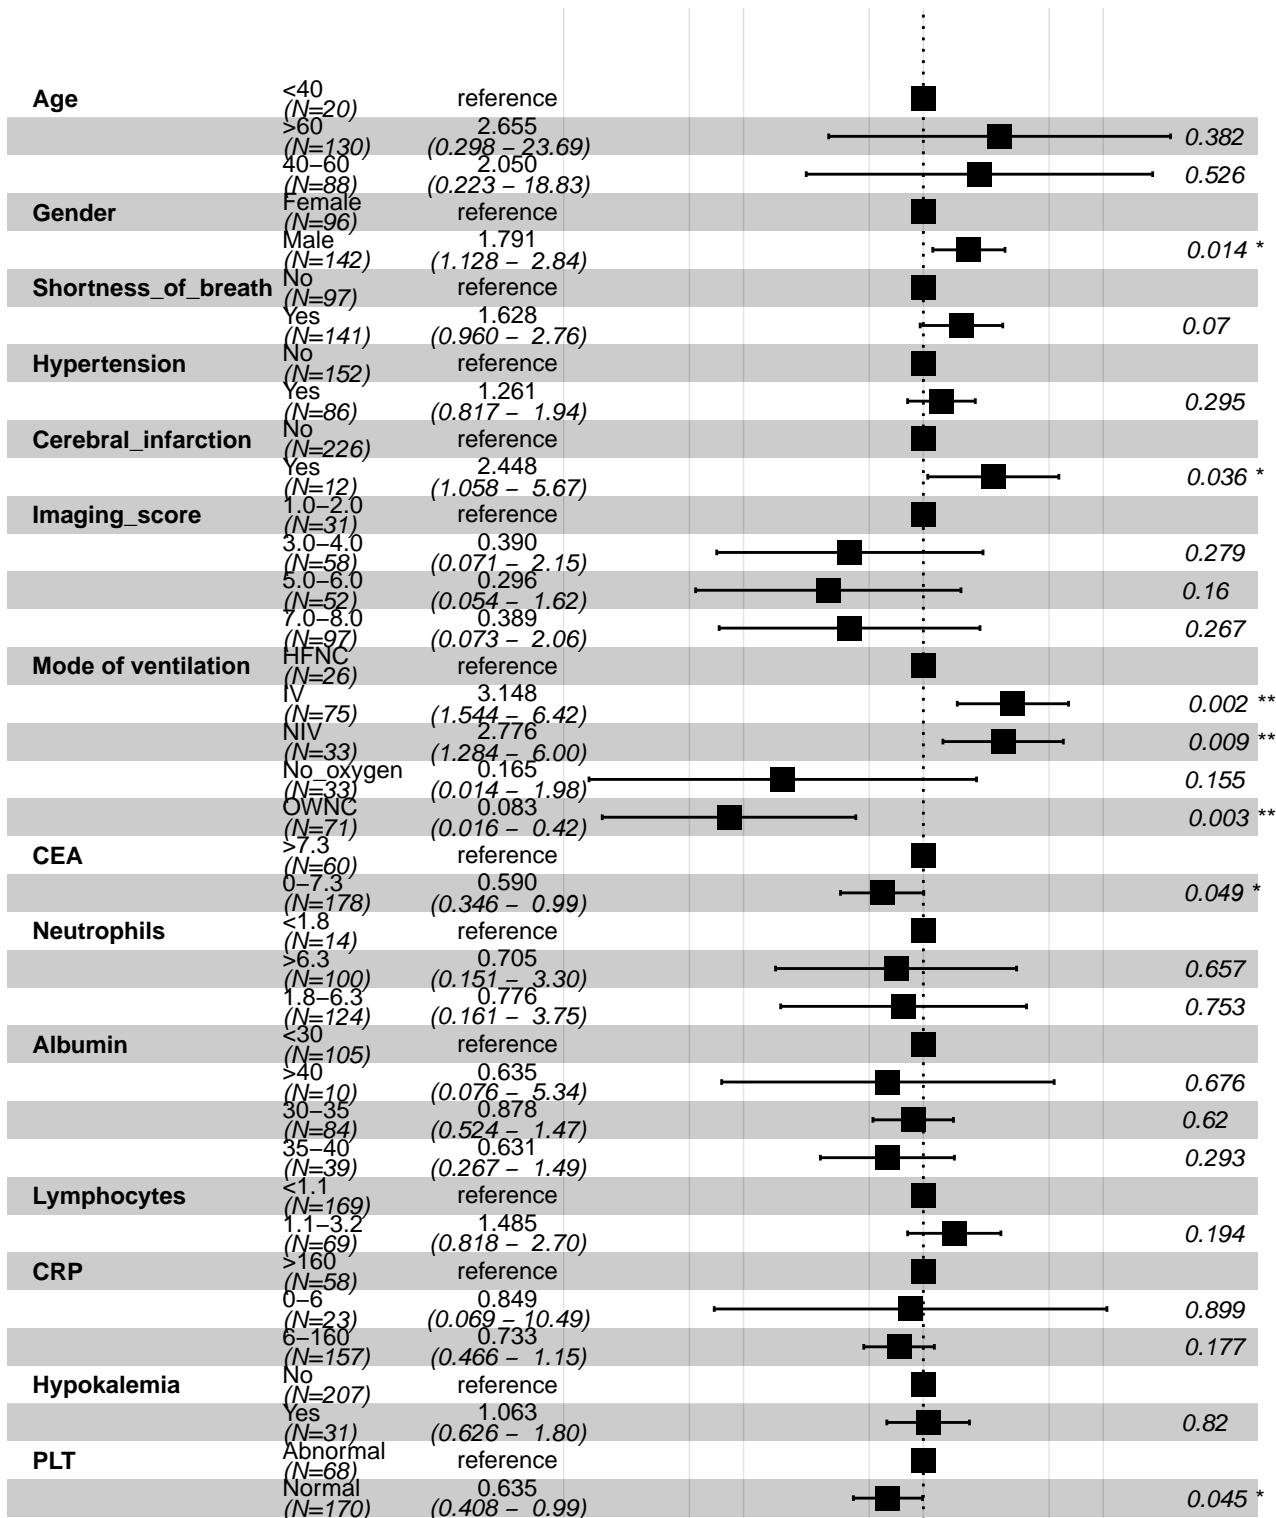

# Events: 111; Global p-value (Log-Rank): 1.3514e-19

AIC: 926.07; Concordance Index: 0.81

0.01      0.05    0.1      0.5    1      5    10

# Hazard ratio

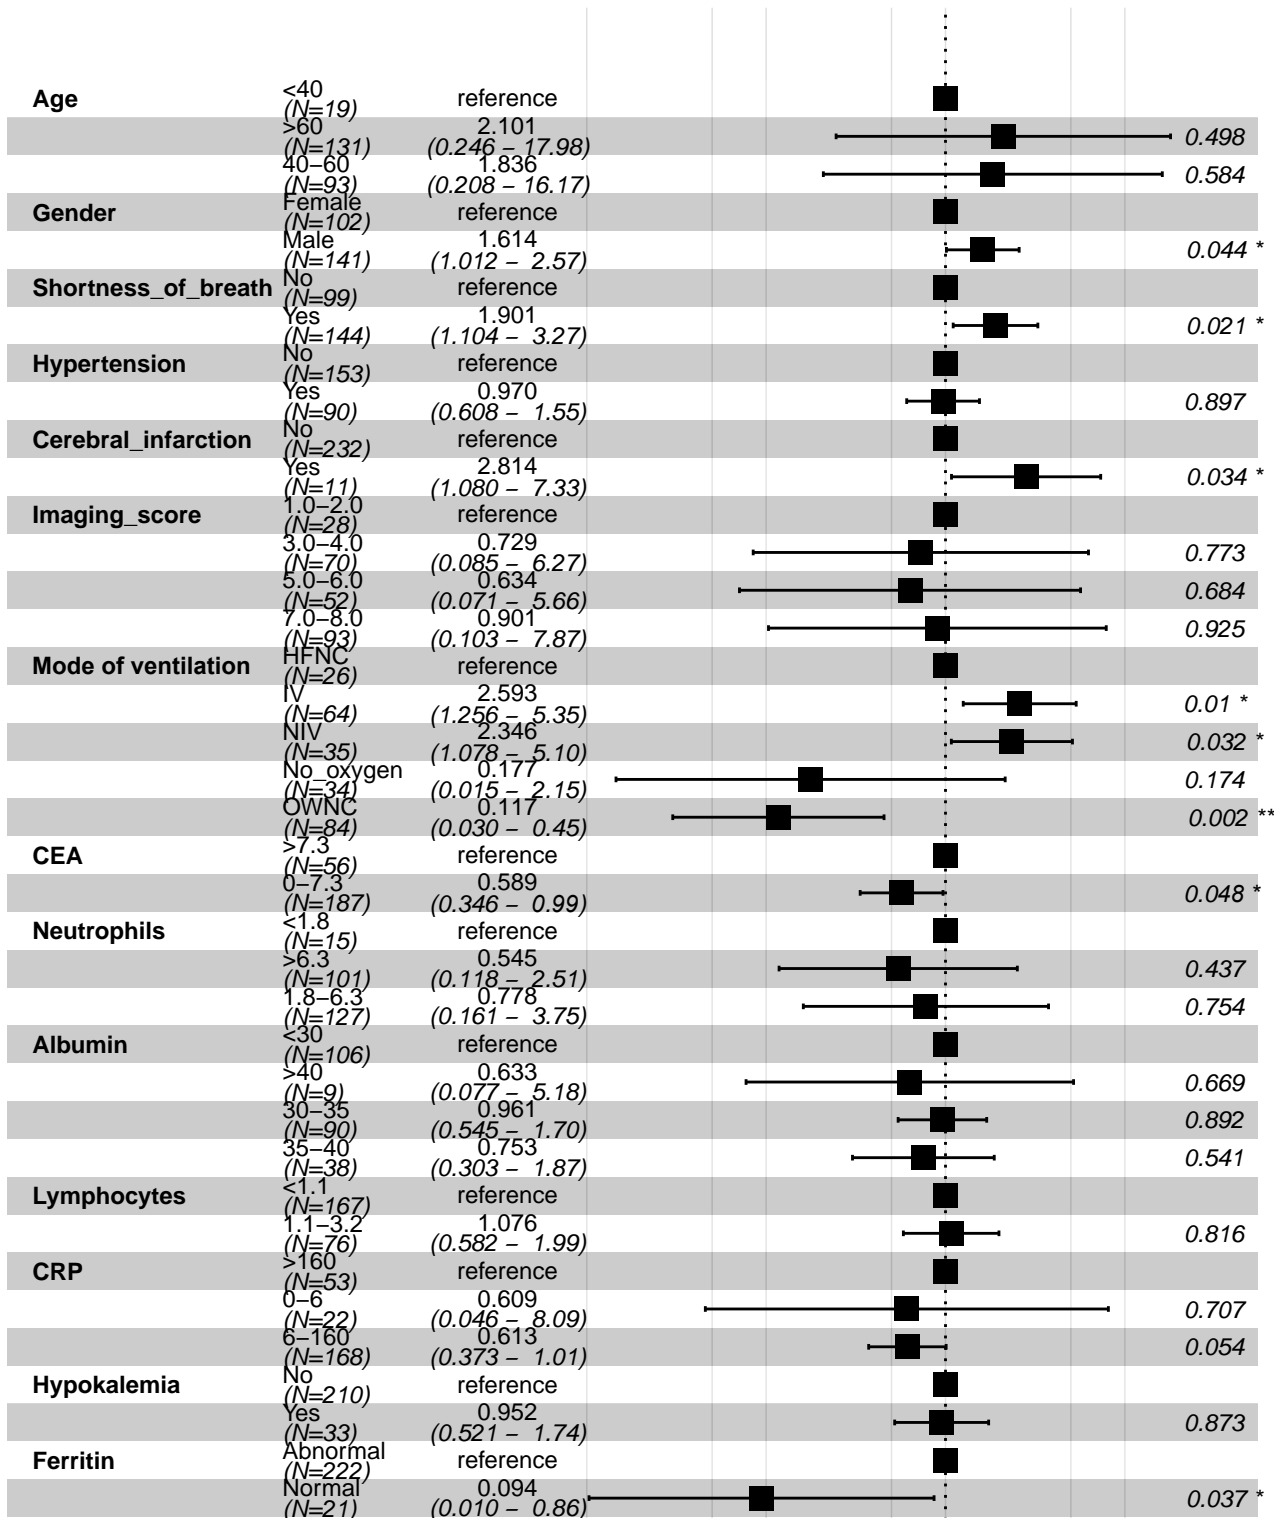

# Events: 101; Global p-value (Log-Rank): 4.7179e-19

AIC: 852.31; Concordance Index: 0.82

0.01      0.05      0.1      0.5      1      5      10

# Hazard ratio

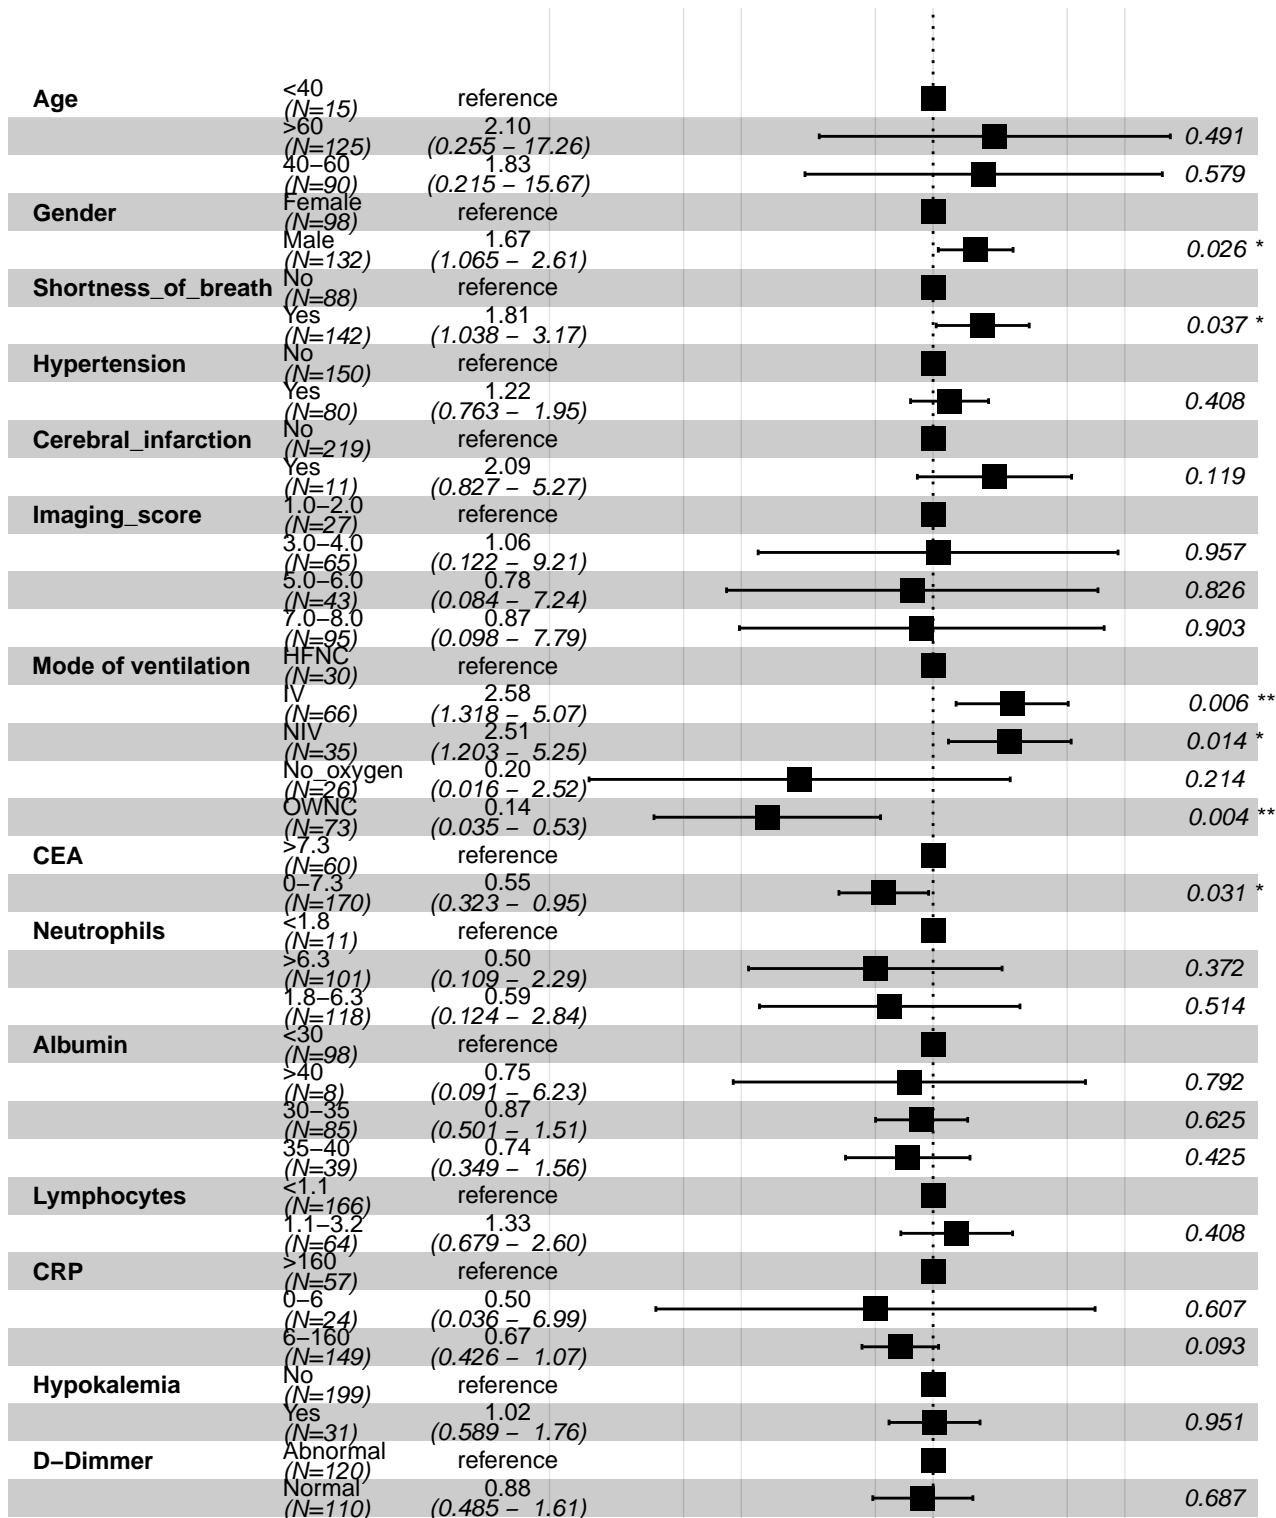

# Events: 105; Global p-value (Log-Rank): 2.7448e-16

AIC: 896.81; Concordance Index: 0.8

0.01      0.05    0.1      0.5    1      5    10
