# Supplementary material
Source: PubMed Central journal article supplement (PMC8254975)
Supplement: 13054_2021_3661_MOESM4_ESM.pdf [file 13054_2021_3661_MOESM4_ESM.pdf]

# Hazard ratio

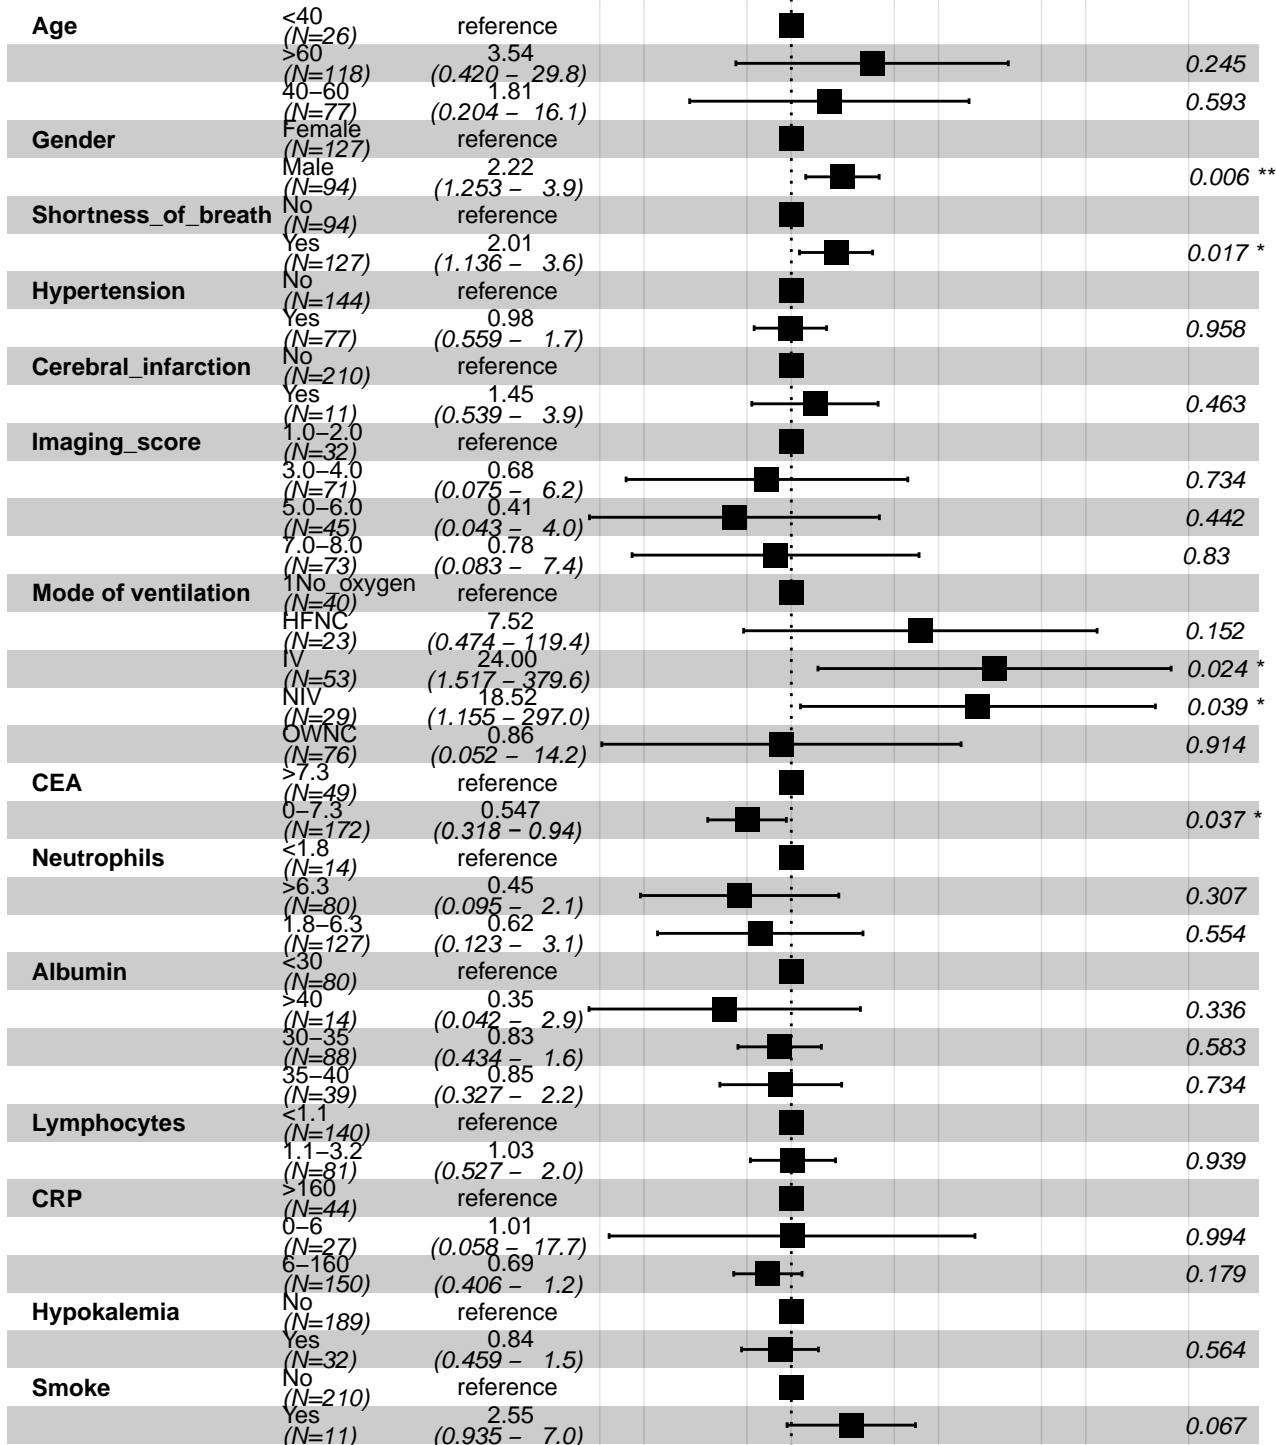

# Events: 85; Global p-value (Log-Rank): 9.7865e-17

AIC: 690.2; Concordance Index: 0.84

0.05 0.1 0.5 1 5 10 50 100 500

# Hazard ratio

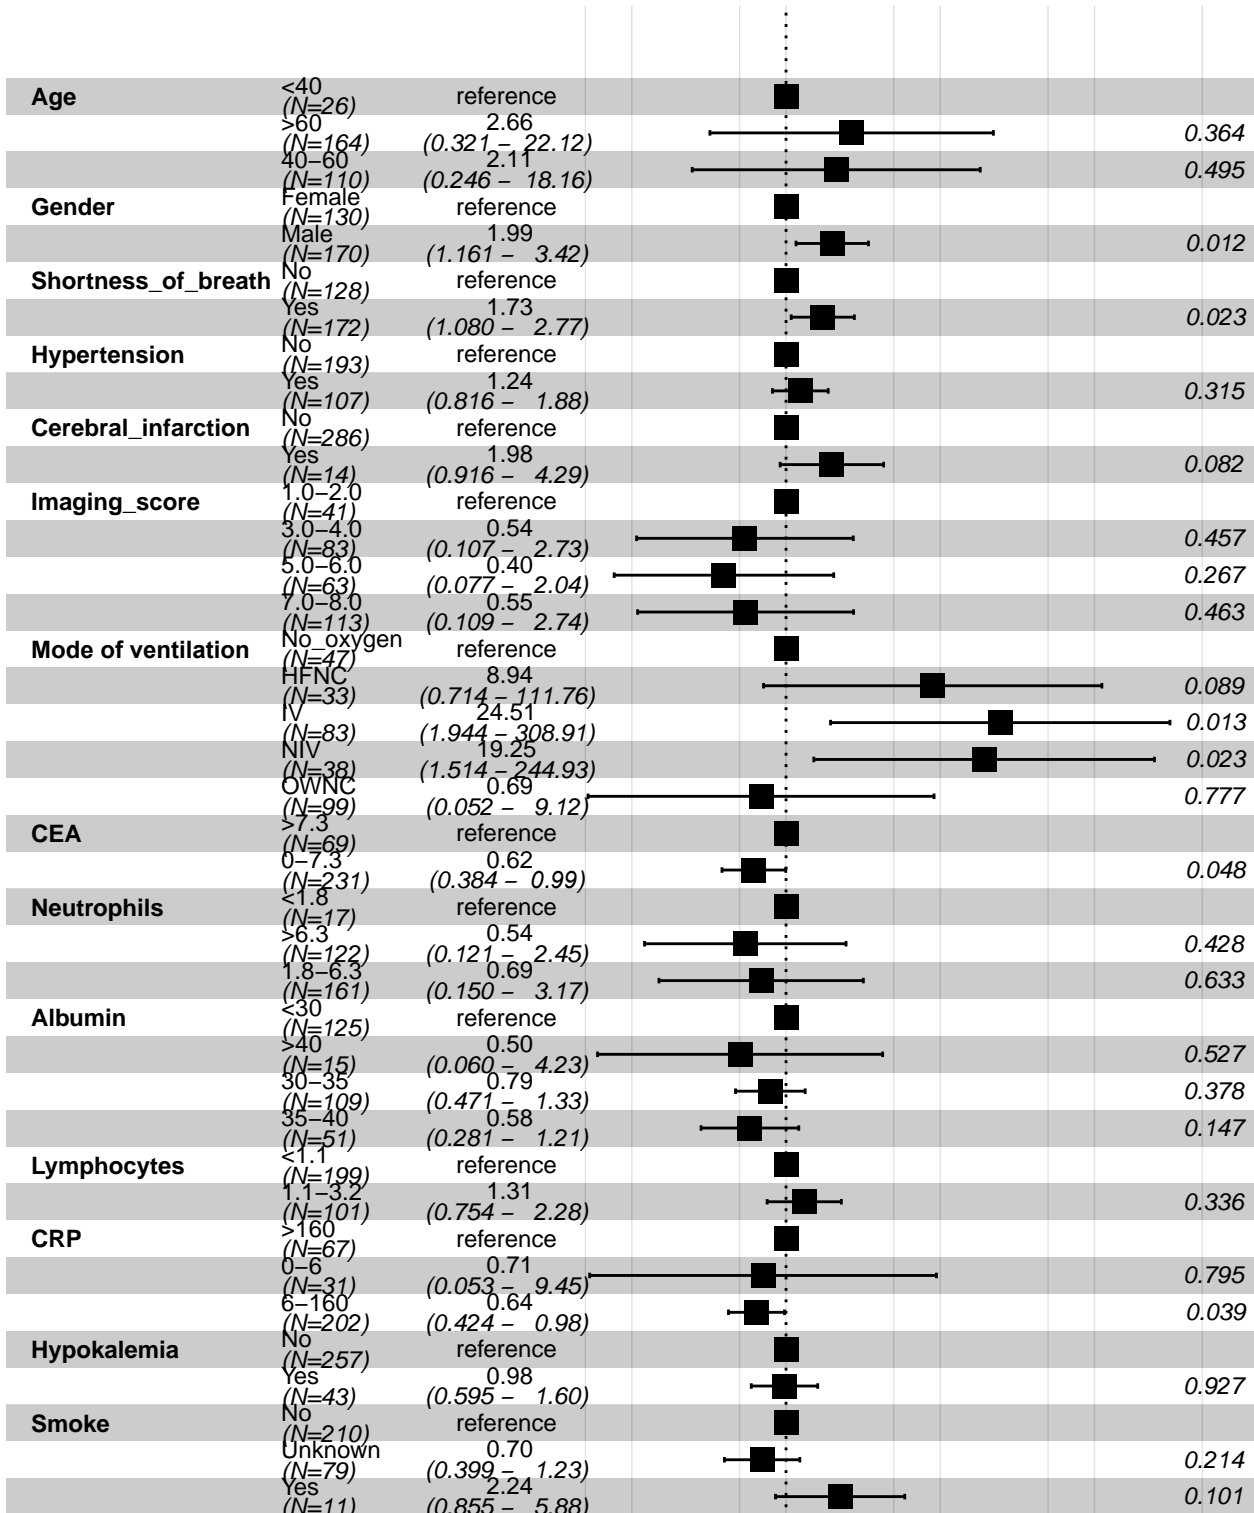

# Events: 126; Global p-value (Log-Rank): 4.5918e-26

AIC: 1095.84; Concordance Index: 0.83

0.05 0.1 0.5 1 5 10 50 100 500
